# Supplementary material
Source: publisher figshare collection journal article supplement (https://acs.figshare.com/ndownloader/files/3758110)
Supplement: Supplementary file 1 [file 3758110]

## Supporting information

### Highly Resolved Nanostructured PEDOT on Large Area by Nanosphere Lithography and Electrodeposition

*Van Quynh Nguyen, Delphine Schaming, Pascal Martin and Jean-Christophe Lacroix\**

Université Paris Diderot, Sorbonne Paris Cité, ITODYS, UMR 7086 CNRS, 15 rue Jean-Antoine de Baïf, 75205 Paris Cedex 13, France.

[lacroix@univ-paris-diderot.fr](mailto:lacroix@univ-paris-diderot.fr)

## Theoretical pore depth according to the deposition charge

A triangular paving of the electrode can be drawn in order to simplify the development of the formula. Indeed, if we consider an electrode of surface  $S$  covered with nanospheres of radius  $R$ , we can divide this surface in  $N$  triangles defined by the centre of three nanospheres as represented Figure SI1a.

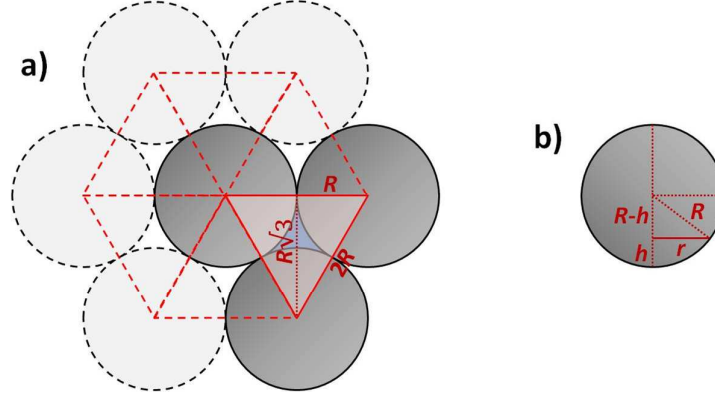

**Figure SI1 a)** Top view of a nanosphere (radius  $R$ ) monolayer, with the triangular paving. **b)** Side view of a nanosphere, with a section of radius  $r$  at a height  $h$ .

The area of one triangle is:

$$A_t = \sqrt{3}R^2$$

Consequently, the surface of the electrode can be expressed as:

$$S = N\sqrt{3}R^2$$

At a height  $h$ , radius of a nanosphere equals to (Figure SI1b):

$$r = \sqrt{2Rh - h^2}$$

As a consequence, area occupied with portions of nanospheres inside one triangle at a height  $h$  is:

$$A_{\text{occ}} = \frac{\pi}{2}(2Rh - h^2)$$

Then, section of a cavity between nanospheres at a height  $h$  is:

$$A_{\text{cavity}} = \sqrt{3}R^2 - \pi Rh + \frac{\pi}{2}h^2$$

Integration of  $A_{\text{cavity}}$  between  $h = 0$  and  $h = e$ , with  $e$  the pore depth, leads to the volume of a cavity between nanospheres:

$$V_{\text{cavity}} = \int_{h=0}^e A_{\text{cavity}} dh = \sqrt{3}R^2 e - \frac{\pi}{2} R e^2 + \frac{\pi}{6} e^3$$

Consequently, for an electrode of surface  $S$ , free volume between nanospheres at a height  $e$  is given by the formula:

$$V_{\text{free}} = NV_{\text{cavity}} = \frac{S}{\sqrt{3}R^2} \left( \sqrt{3}R^2e - \frac{\pi}{2}Re^2 + \frac{\pi}{6}e^3 \right)$$

The free volume between nanospheres on electrode can also be related to the deposited charge  $Q$  as:

$$V_{\text{free}} = \frac{MQ}{2.2F\rho}$$

with  $F$  the Faraday constant,  $\rho$  the PEDOT density and  $M$  its molar mass ( $M = M_{\text{EDOT}} + M_{\text{dodecylsulfate}}$ ).

It results the relation between the deposition charge  $Q$  and the pore depth  $e$ :

$$\frac{Q}{S} = \frac{2.2F\rho e}{M_{\text{EDOT}} + 0.2M_{\text{dodecylsulfate}}} \left( 1 - \frac{\pi}{2\sqrt{3}} \frac{e}{R} + \frac{\pi}{6\sqrt{3}} \frac{e^2}{R^2} \right)$$

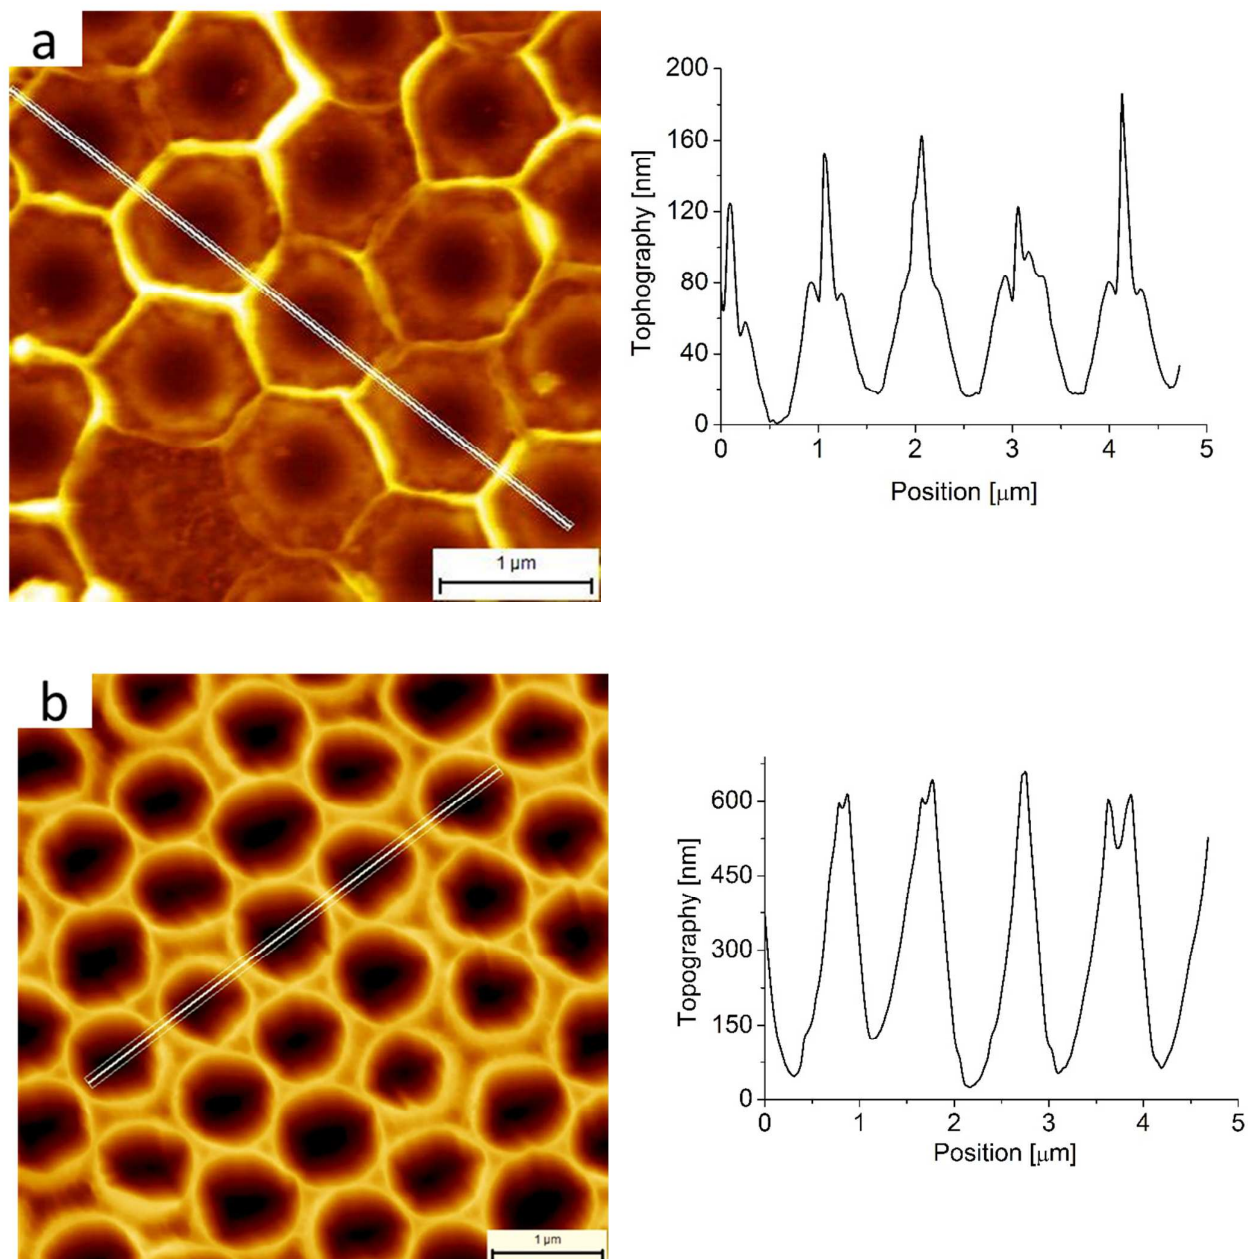

Figure S2: (a) AFM characterization and topographic profile of two PEDOT nanostructures generated using deposition charge of 16 and 40  $\text{mC cm}^{-2}$  in 0.02 M EDOT, 0.1 M SDS and 0.1 M  $\text{LiClO}_4$  aqueous solution. (b) Corresponding average pore deepness of 150 and 550 nm respectively.

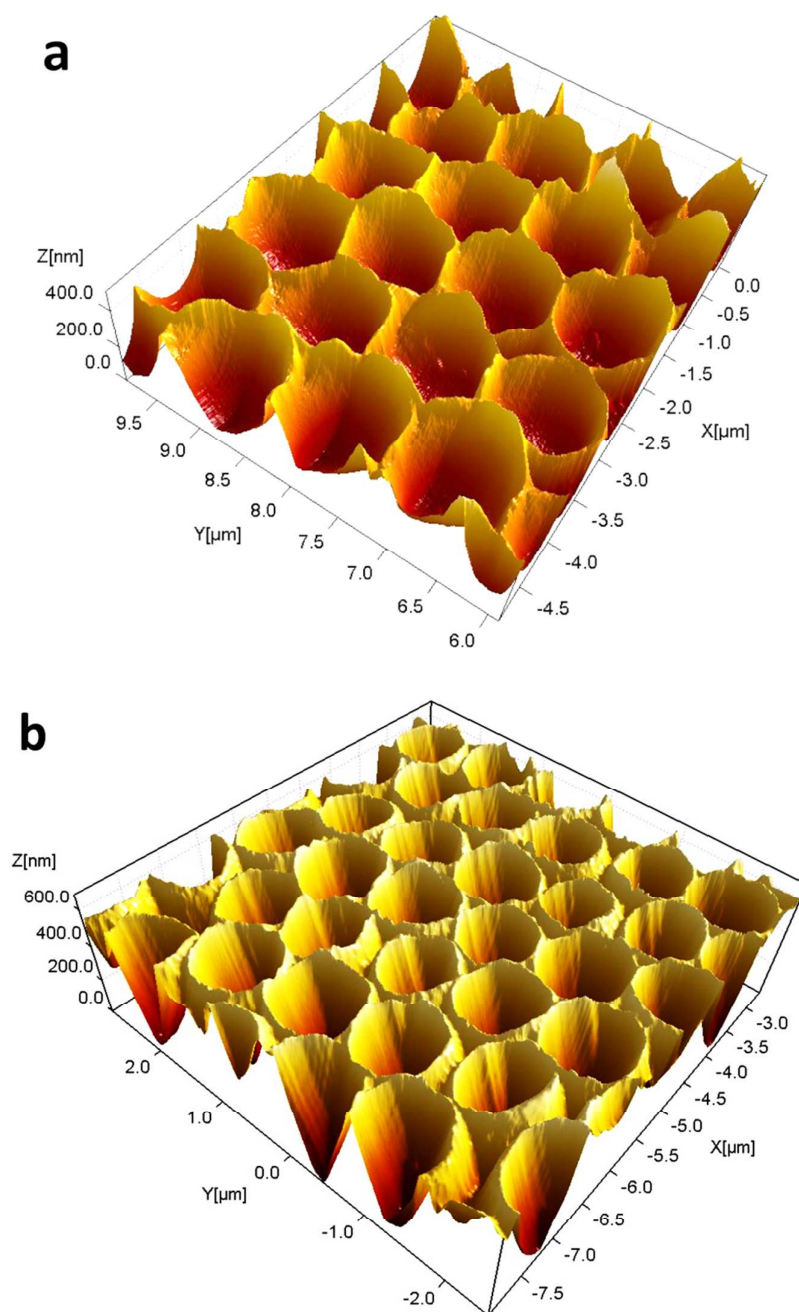

Figure S3: 3D images of a PEDOT nanostructure with (a) 380nm and (b) 550 nm pores depth generated in 0.02 M EDOT, 0.1 M SDS and 0.1 M  $\text{LiClO}_4$  aqueous solution.

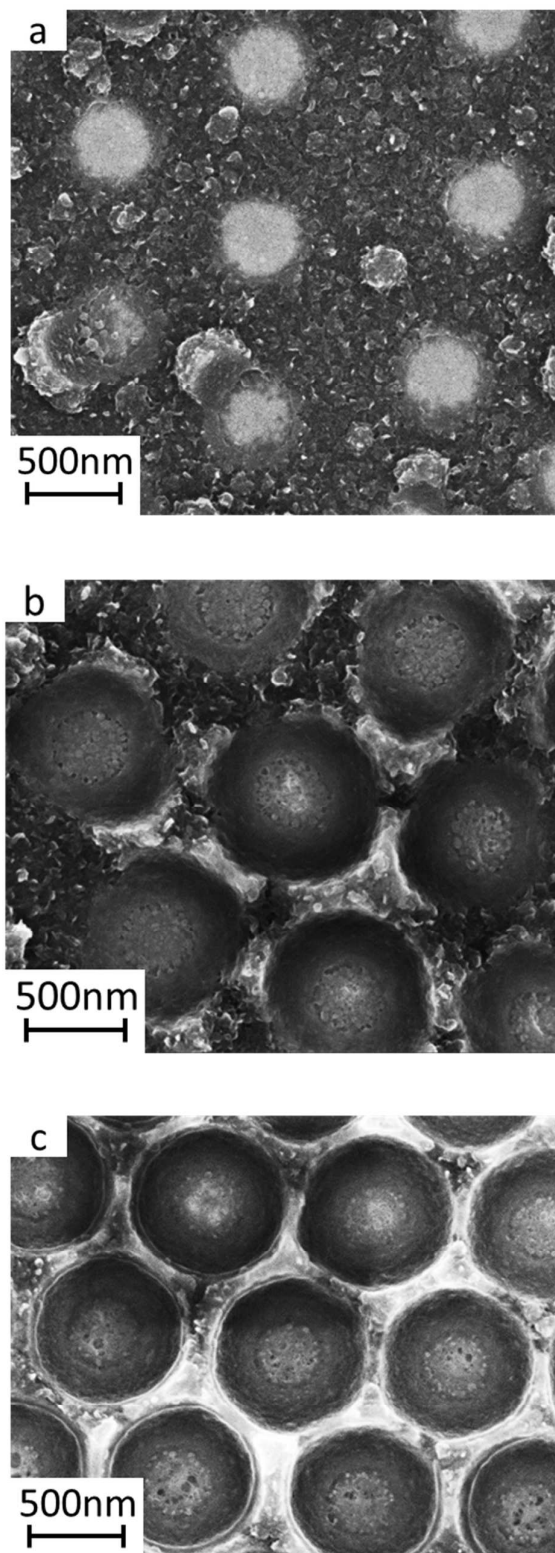

Figure S4: SEM image of a PEDOT nanostructure generated in LiClO<sub>4</sub> 0.1M, EDOT 0.02M, water solution without SDS. Charge density used during deposition is (a) 12 mC.cm<sup>-2</sup>, (b) 22 mC.cm<sup>-2</sup> and (c) 40 mC.cm<sup>-2</sup> respectively

| Sample number      |         | 1         | 2         | 3          | 4          | 5          | 6          | Bulk PEDOT  |
|--------------------|---------|-----------|-----------|------------|------------|------------|------------|-------------|
| Pore Depth (nm)    |         | 65        | 200       | 290        | 350        | 430        | 520        | 200         |
| Contact angles (°) | Min     | 84.4      | 77.6      | 114.4      | 122        | 124.1      | 125.7      | 61.3        |
|                    | Max     | 87.8      | 92.15     | 117.1      | 123.15     | 126.8      | 129.6      | 63.8        |
|                    | Average | <b>86</b> | <b>85</b> | <b>116</b> | <b>123</b> | <b>125</b> | <b>128</b> | <b>62.5</b> |

Table S1: Contact angle measured on nanostructured PEDOT films of various thicknesses and of bulk PEDOT all samples are prepared in 0.02 M EDOT, 0.1 M SDS and 0.1 M LiClO<sub>4</sub> aqueous solution
